# Supplementary material
Source: PubMed Central journal article supplement (PMC3079006)
Supplement: NIHMS261013-supplement-3.pdf [file NIHMS261013-supplement-3.pdf]

## Supplemental Figure Legend.

**Supplemental Figure 1. Vandetanib inhibited proliferation of ATC cell lines Hth83 and 8505C in vitro.** ATC cell lines Hth3 and 8505C were incubated for 72hrs in increasing concentrations of vandetanib ( 0.59-150  $\mu\text{M}$  ) in media supplemented with 10% FBS. At the end of 72 hrs the optical density of the treated and untreated cells were measured using an MTT assay. Proliferation was found to be inhibited in a dose dependent manner with mean GI50 in at least three independent experiments for Hth83 of 3.30  $\mu\text{M}$  and 7.56  $\mu\text{M}$  for 8505C. Y axis indicates optical density sample/ optical density control at 570 nm, X axis indicates log concentration of Vandetanib in  $\mu\text{M}$  and error bars indicate SE (n=6 ).
